# Supplementary material for: Aesthetic Preference in the Transverse Orientation of the Occlusal Plane in Rehabilitation: Perspective of Laypeople and Dentists
Source: MDPI journal article supplement (doi:10.3390/ijerph182212258), 2021-11-22
Supplement: s1 [file s1]

*Supplementary Material:*

**Figure S1.** Parametros Esteticos: Perspetiva De Leigos e de Medicos Dentistas.

O presente questionário foi elaborado no âmbito de um projeto de investigação do Mestrado Integrado em Medicina Dentária da Universidade Fernando Pessoa e tem como objetivo avaliar a influência da inclinação da linha média dentária e da inclinação transversal do plano oclusal em faces assimétricas.

Este questionário não deve ser respondido por Estudantes de Medicina Dentária.

É destinado apenas a Médicos Dentistas OU a pessoas que não têm qualquer tipo de conhecimento na área da medicina dentária (leigos), maiores de 18 anos.

O ideal é utilizar um tablet/computador para responder as questões, uma vez que neste questionário é necessário uma observação pormenorizada de algumas imagens. Se estiver a usar o telemóvel, redobre a atenção.

O questionário está dividido em parte 1 e parte 2:

- Parte 1: Será pedido para, escolher entre 2 fotografias a que (na sua opinião) considera com maior nível de atratividade do sorriso.

- Parte 2: Numa primeira fase será pedido para apenas observar atentamente as imagens, e numa segunda fase para classificar o grau de atratividade escala de 0 (nada atraente)-10 (muito atraente) das imagens que vão aparecendo ao longo do questionário.

Não existem respostas certas ou erradas. Responda apenas 1 vez ao questionário.

Este questionário é voluntário, tem o direito de recusar a todo o tempo a sua participação, sem que isso possa ter como efeito qualquer prejuízo pessoal.

O questionário é anónimo, e as respostas às questões serão confidenciais e utilizadas única e exclusivamente para o estudo em causa, sendo guardadas em local seguro durante a pesquisa e destruídas após a sua conclusão/publicação.

Ao prosseguir com o preenchimento deste questionário, declara que assente em participar no estudo em causa, nos termos acima descritos.

Agradecemos, desde já, a sua colaboração.

Caso tenha alguma questão, poderá entrar em contacto connosco através dos seguintes e-mails: [36378@ufp.edu.pt](mailto:36378@ufp.edu.pt) ou [34955@ufp.edu.pt](mailto:34955@ufp.edu.pt).

Ana Lidia Carvalho

Joana Meneses Martins

**\*Obrigatório**

1. Ao assinalar "SIM" estará a aceitar participar voluntariamente no estudo, permitindo a utilização dos dados fornecidos com o propósito de aumentar o conhecimento científico, confiando que estes apenas serão utilizados para esta investigação e nas garantias de confidencialidade e anonimato. \*

*Marcar apenas uma oval.*

- ☐ SIM, aceito participar no estudo de acordo com a informação acima facultada.
- ☐ NÃO pretendo participar no estudo.

Questionário:

2. Qual é a sua faixa etária? \*

*Marcar apenas uma oval.*

- ☐ De 18 a 25 anos
- ☐ De 26 a 35 anos
- ☐ De 36 a 45 anos
- ☐ De 46 a 55 anos
- ☐ De 56 a 65 anos
- ☐ A partir dos 65 anos

3. Qual é o seu Género? \*

*Marcar apenas uma oval.*

- ☐ Feminino
- ☐ Masculino

4. É: \*

*Marcar apenas uma oval.*

- ☐ Médico Dentista  
☐ Leigo *Pular para a pergunta 6*

É Médico Dentista

5. Qual é a principal área da Medicina Dentária a que se dedica? \*

*Marcar apenas uma oval.*

- ☐ Cirurgia Oral  
☐ Odontopediatria  
☐ Ortodontia  
☐ Periodontologia  
☐ Endodontia  
☐ Prostodontia  
☐ Medicina Dentária Hospitalar  
☐ Saúde Pública Oral  
☐ Outro: \_\_\_\_\_

6. Na sua opinião, qual sorriso considera mais atrativo? \*

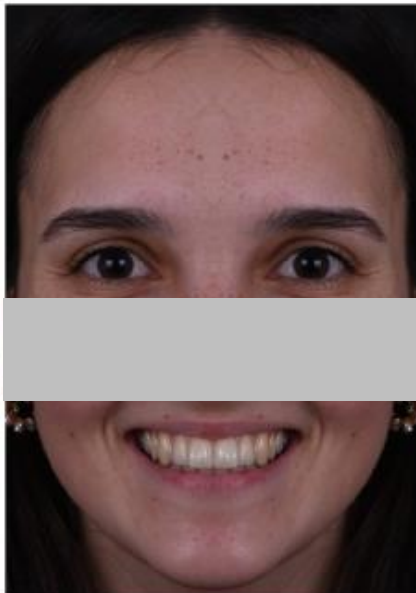

**Opção 1**

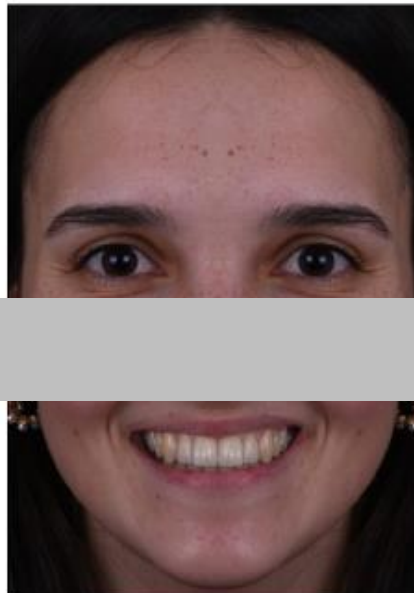

**Opção 2**

*Marcar apenas uma oval.*

- ☐ Opção 1  
☐ Opção 2

7. Na sua opinião, qual sorriso considera mais atrativo? \*

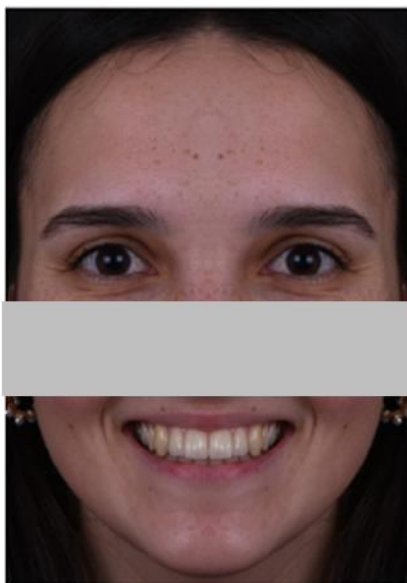

**Opção 1**

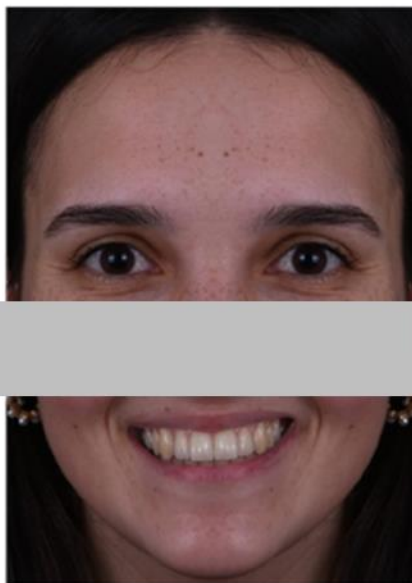

**Opção 2**

*Marcar apenas uma oval.*

☐ Opção 1

☐ Opção 2

8. Na sua opinião, qual sorriso considera mais atrativo? \*

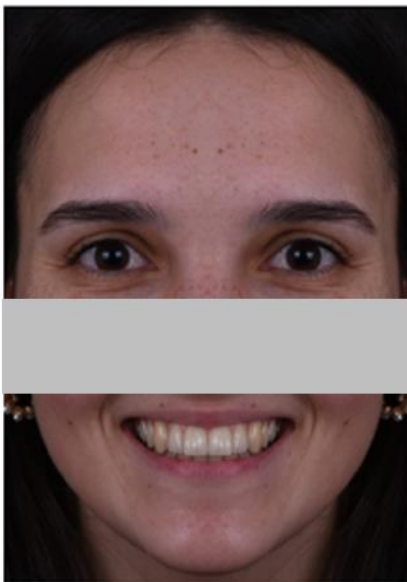

**Opção 1**

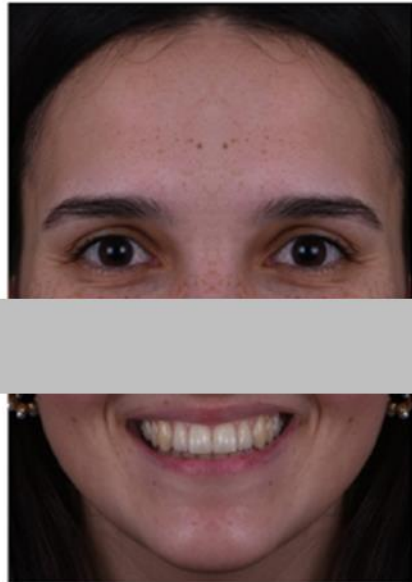

**Opção 2**

*Marcar apenas uma oval.*

☐ Opção 1

☐ Opção 2

9. Na sua opinião, qual sorriso considera mais atrativo? \*

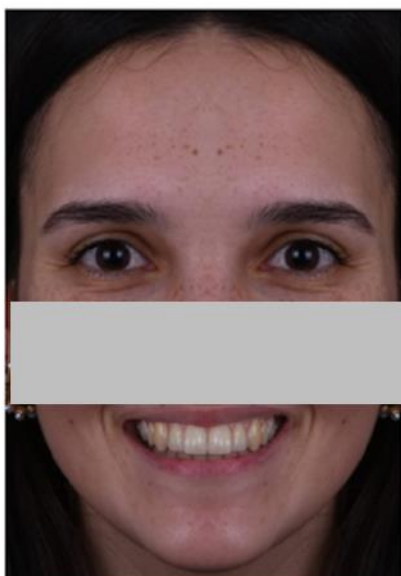

**Opção 1**

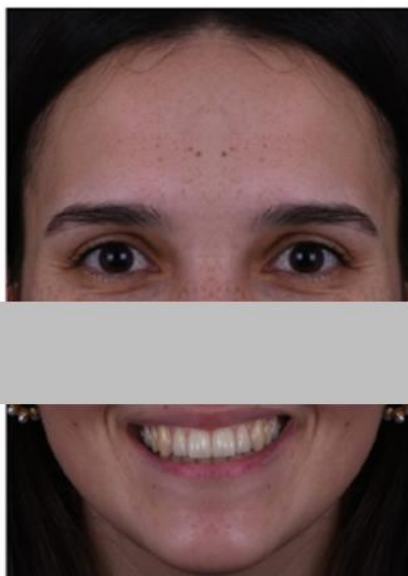

**Opção 2**

*Marcar apenas uma oval.*

☐ Opção 1

☐ Opção 2

10. Na sua opinião, qual sorriso considera mais atrativo? \*

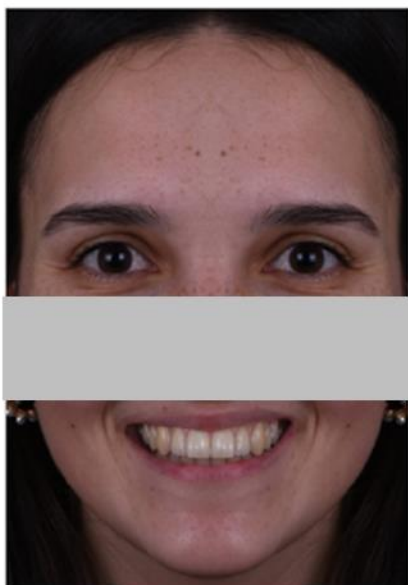

**Opção 1**

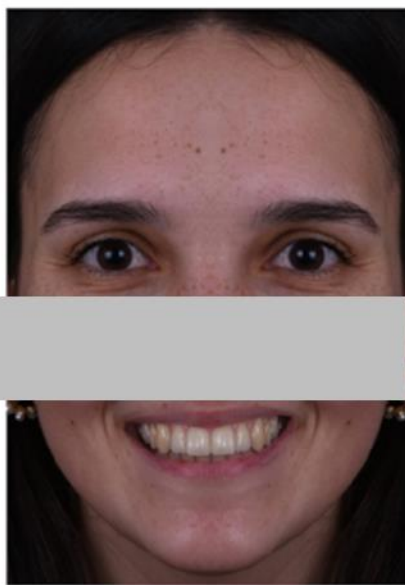

**Opção 2**

*Marcar apenas uma oval.*

☐ Opção 1

☐ Opção 2

11. Na sua opinião, qual sorriso considera mais atrativo? \*

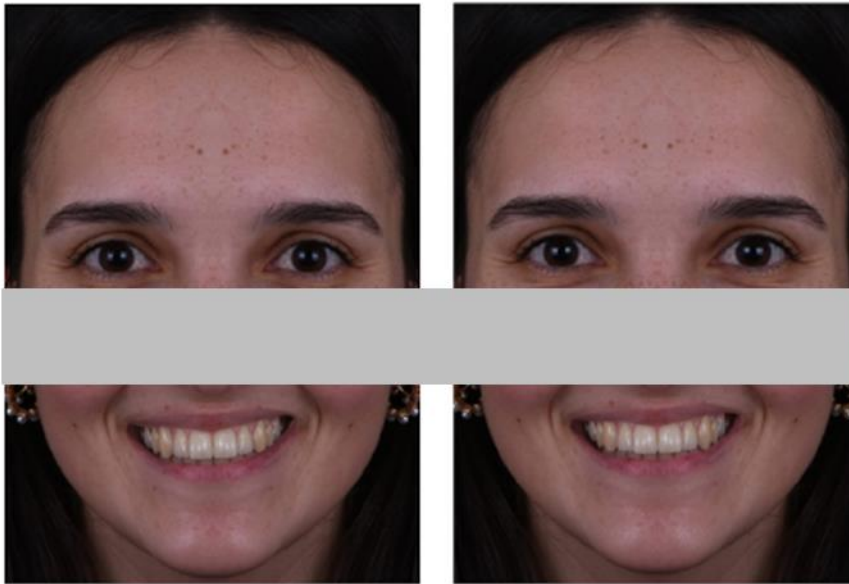

**Opção 1**

**Opção 2**

*Marcar apenas uma oval.*

☐ Opção 1

☐ Opção 2
